# Supplementary material
Source: ML conference proceedings conference paper supplement (https://openaccess.thecvf.com/content/CVPR2024/html/Wang_DUSt3R_Geometric_3D_CVPR_2024_paper.html)
Supplement: Supplementary file 1 [file Wang_DUSt3R_Geometric_3D_CVPR_2024_supplemental.zip]

Archive with 2 entries (2 files):
- 4520_supp.pdf
- 4520_supp.mp4
